# Supplementary material for: Satisfactions on Self-Perceived Health of Urban Residents in Chengdu, China: Gender, Age and the Built Environment
Source: MDPI journal article supplement (doi:10.3390/su142013389), 2022-10-17
Supplement: s1 [file s1]

## Supplementary Material

**Figure S1.** A typical traditional housing neighborhood

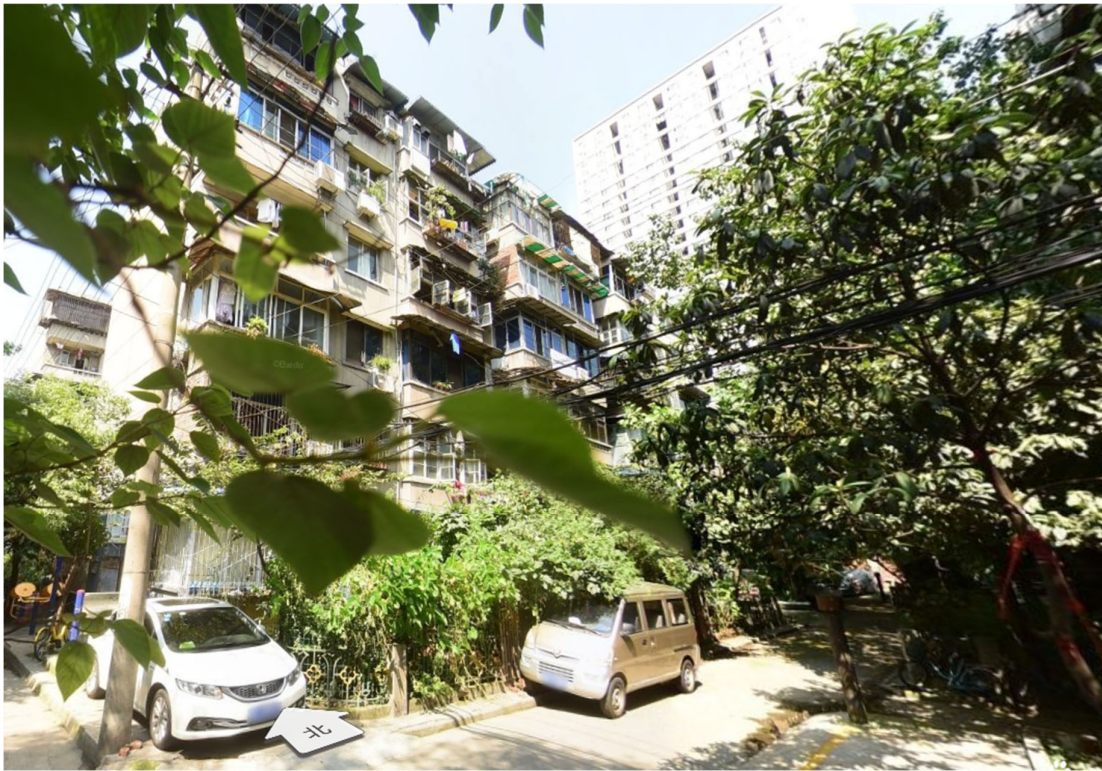

Note: Picture taken on Baidu Streetview, March 11<sup>th</sup>, 2021

**Table S1.** Statistical summary of variables by the whole population, gender, and age group

|                            |                  |                  |                   |     | Mean (SD) or Percentage |                         |                         |                          |                       |     |
|----------------------------|------------------|------------------|-------------------|-----|-------------------------|-------------------------|-------------------------|--------------------------|-----------------------|-----|
|                            | All<br>(n=881)   | Male<br>(n=450)  | Female<br>(n=431) |     | Age<br>18-29<br>(n=220) | Age<br>30-39<br>(n=158) | Age<br>40-49<br>(n=181) | Age 50-<br>59<br>(n=146) | Age<br>60+<br>(n=176) |     |
| Health perception          | 2.81<br>(0.95)   | 2.69<br>(0.95)   | 2.94<br>(0.93)    | *** | 2.28<br>(0.76)          | 2.57<br>(0.78)          | 2.85<br>(0.84)          | 3.18<br>(0.91)           | 3.38<br>(1.01)        | *** |
| Excellent (1)              | 0.050            | 0.076            | 0.028             | *** | 0.132                   | 0.044                   | 0.033                   | 0.007                    | 0.017                 | *** |
| Very good (2)              | 0.360            | 0.390            | 0.320             | *** | 0.514                   | 0.462                   | 0.309                   | 0.253                    | 0.210                 | *** |
| Good (3)                   | 0.350            | 0.322            | 0.387             | *** | 0.300                   | 0.386                   | 0.464                   | 0.356                    | 0.278                 | *** |
| Fair (4)                   | 0.190            | 0.176            | 0.209             | *** | 0.055                   | 0.095                   | 0.166                   | 0.322                    | 0.369                 | *** |
| Poor (5)                   | 0.050            | 0.031            | 0.050             | *** | 0.000                   | 0.013                   | 0.028                   | 0.062                    | 0.125                 | *** |
| Demography                 |                  |                  |                   |     |                         |                         |                         |                          |                       |     |
| Gender                     |                  |                  |                   |     |                         |                         |                         |                          |                       |     |
| Male                       | 0.51             |                  |                   |     | 0.555                   | 0.525                   | 0.547                   | 0.397                    | 0.500                 |     |
| Female                     | 0.49             |                  |                   |     | 0.445                   | 0.475                   | 0.453                   | 0.603                    | 0.500                 |     |
| Age                        | 43.55<br>(14.84) | 42.63<br>(14.88) | 44.51<br>(14.76)  |     |                         |                         |                         |                          |                       |     |
| Years living in<br>Chengdu | 28.75<br>(20.4)  | 27.76<br>(20.37) | 29.79<br>(20.41)  |     | 14.26<br>(10.12)        | 22.04<br>(12.44)        | 25.55<br>(15.58)        | 35.03<br>(20.89)         | 48.92<br>(21.61)      | *** |
| Years of<br>education      | 9.95<br>(5.37)   | 10.49<br>(6.02)  | 9.38<br>(4.54)    | **  | 13.23<br>(2.81)         | 12.85<br>(7.64)         | 9.55<br>(7.38)          | 6.93<br>(3.42)           | 6.14<br>(3.86)        | *** |

|                                   |               |               |               |     |               |               |               |               |               |     |
|-----------------------------------|---------------|---------------|---------------|-----|---------------|---------------|---------------|---------------|---------------|-----|
| Rural hukou                       |               |               |               |     |               |               |               |               |               |     |
| Yes                               | 0.42          | 0.43          | 0.42          |     | 0.500         | 0.399         | 0.459         | 0.500         | 0.256         | *** |
| No                                | 0.58          | 0.57          | 0.58          |     | 0.500         | 0.601         | 0.541         | 0.500         | 0.744         | *** |
| Chengdu hukou                     |               |               |               |     |               |               |               |               |               |     |
| Yes                               | 0.61          | 0.58          | 0.65          |     | 0.373         | 0.627         | 0.619         | 0.637         | 0.858         | *** |
| No                                | 0.39          | 0.42          | 0.35          |     | 0.627         | 0.373         | 0.381         | 0.363         | 0.142         | *** |
| Household income level            | 2.15 (0.56)   | 2.23 (0.58)   | 2.06 (0.53)   | *** | 2.168 (0.462) | 2.229 (0.535) | 2.249 (0.631) | 1.993 (0.581) | 1.983 (0.540) | *** |
| Low (1)                           | 0.087         | 0.064         | 0.111         |     | 0.027         | 0.019         | 0.088         | 0.171         | 0.153         |     |
| Average (2)                       | 0.686         | 0.653         | 0.719         |     | 0.786         | 0.646         | 0.591         | 0.664         | 0.710         |     |
| Mid-high (3)                      | 0.219         | 0.269         | 0.167         |     | 0.177         | 0.323         | 0.304         | 0.164         | 0.136         |     |
| High (4)                          | 0.008         | 0.013         | 0.002         |     | 0.009         | 0.013         | 0.017         | 0.000         | 0.000         |     |
| Employment status                 |               |               |               |     |               |               |               |               |               |     |
| Currently working                 | 0.687         | 0.769         | 0.601         | *** | 0.923         | 0.924         | 0.901         | 0.514         | 0.102         | *** |
| Retired                           | 0.202         | 0.187         | 0.218         | *** | 0.000         | 0.000         | 0.006         | 0.274         | 0.778         | *** |
| Unemployed                        | 0.030         | 0.024         | 0.035         | *** | 0.023         | 0.025         | 0.022         | 0.075         | 0.011         | *** |
| Homemaker                         | 0.067         | 0.011         | 0.125         | *** | 0.018         | 0.051         | 0.066         | 0.116         | 0.102         | *** |
| Student                           | 0.009         | 0.007         | 0.012         | *** | 0.027         | 0.000         | 0.000         | 0.007         | 0.006         | *** |
| Others                            | 0.006         | 0.002         | 0.009         | *** | 0.009         | 0.000         | 0.006         | 0.014         | 0.000         | *** |
| Working environment               |               |               |               |     |               |               |               |               |               |     |
| Indoors                           | 0.731         | 0.713         | 0.749         |     | 0.845         | 0.899         | 0.702         | 0.548         | 0.619         | *** |
| Outdoors                          | 0.251         | 0.258         | 0.244         |     | 0.127         | 0.101         | 0.276         | 0.425         | 0.369         | *** |
| Underground/Underwater            | 0.006         | 0.011         | 0.000         |     | 0.009         | 0.000         | 0.011         | 0.007         | 0.000         | *** |
| Others                            | 0.012         | 0.018         | 0.007         |     | 0.018         | 0.000         | 0.011         | 0.021         | 0.011         | *** |
| Chance of getting injured at work | 2.63 (2.53)   | 2.82 (2.61)   | 2.44 (2.43)   | *   | 2.60 (2.46)   | 2.39 (2.36)   | 2.82 (2.69)   | 3.10 (2.67)   | 2.32 (2.46)   |     |
| Years of working                  | 19.42 (13.74) | 19.59 (13.86) | 19.24 (13.62) | *   | 4.62 (2.97)   | 11.22 (5.10)  | 21.56 (5.47)  | 27.29 (10.69) | 36.53 (10.15) | *** |
| Marital status                    |               |               |               |     |               |               |               |               |               |     |
| Currently married                 | 0.74          | 0.71          | 0.78          | **  | 0.314         | 0.892         | 0.928         | 0.863         | 0.863         | *** |
| Currently not married             | 0.26          | 0.29          | 0.22          | **  | 0.686         | 0.108         | 0.072         | 0.137         | 0.137         | *** |
| Household size                    | 3.16 (1.33)   | 3.12 (1.31)   | 3.2 (1.36)    |     | 2.86 (1.48)   | 3.58 (1.36)   | 3.34 (1.06)   | 3.30 (1.32)   | 2.86 (1.25)   |     |
| Lifestyle and Health Awareness    |               |               |               |     |               |               |               |               |               |     |
| Air quality perception            | 3.26 (0.91)   | 3.28 (0.93)   | 3.23 (0.90)   |     | 3.25 (0.89)   | 3.39 (0.93)   | 3.29 (0.81)   | 3.33 (0.91)   | 3.05 (1.00)   | .   |
| Very good (1)                     | 0.014         | 0.011         | 0.016         |     | 0.000         | 0.019         | 0.011         | 0.007         | 0.034         |     |
| Good (2)                          | 0.192         | 0.202         | 0.181         |     | 0.209         | 0.133         | 0.144         | 0.171         | 0.290         |     |
| Neutral (3)                       | 0.410         | 0.380         | 0.441         |     | 0.432         | 0.405         | 0.436         | 0.418         | 0.352         |     |
| Bad (4)                           | 0.295         | 0.313         | 0.276         |     | 0.264         | 0.323         | 0.365         | 0.295         | 0.239         |     |
| Very bad (5)                      | 0.090         | 0.100         | 0.080         |     | 0.095         | 0.120         | 0.044         | 0.110         | 0.085         |     |
| Smoking                           |               |               |               |     |               |               |               |               |               | .   |
| Yes                               | 0.36          | 0.65          | 0.05          | *** | 0.364         | 0.418         | 0.376         | 0.349         | 0.290         |     |
| No                                | 0.64          | 0.35          | 0.95          | *** | 0.636         | 0.582         | 0.624         | 0.651         | 0.710         |     |
| Hours of weekly exercise          | 5.95 (7.33)   | 5.91 (7.39)   | 5.99 (7.27)   |     | 5.40 (5.75)   | 4.90 (6.99)   | 4.53 (7.26)   | 6.50 (8.52)   | 8.58 (7.72)   | *** |
| Health insurance                  |               |               |               |     |               |               |               |               |               |     |
| Yes                               | 0.82          | 0.84          | 0.81          |     | 0.727         | 0.791         | 0.873         | 0.849         | 0.930         | *** |
| No                                | 0.18          | 0.16          | 0.19          |     | 0.273         | 0.209         | 0.127         | 0.151         | 0.070         | *** |

|                                     |                 |                |                 |     |                 |                 |                 |                 |                 |     |
|-------------------------------------|-----------------|----------------|-----------------|-----|-----------------|-----------------|-----------------|-----------------|-----------------|-----|
| Familiarity to asthma               | 3.1<br>(0.86)   | 3 (0.88)       | 3.03<br>(0.84)  |     | 3.04<br>(0.89)  | 2.92<br>(0.83)  | 2.89<br>(0.80)  | 3.10<br>(0.88)  | 3.13<br>(0.86)  |     |
| Very familiar                       | 0.03            | 0.03           | 0.03            |     | 0.045           | 0.013           | 0.028           | 0.027           | 0.040           |     |
| (1) Little familiar                 | 0.27            | 0.29           | 0.24            |     | 0.236           | 0.348           | 0.298           | 0.260           | 0.193           |     |
| (2) Not familiar (3)                | 0.26            | 0.32           | 0.40            |     | 0.355           | 0.342           | 0.431           | 0.295           | 0.369           |     |
| Not familiar at all (4)             | 0.34            | 0.36           | 0.33            |     | 0.364           | 0.297           | 0.243           | 0.418           | 0.398           |     |
| Willing to pay for asthma treatment |                 |                |                 |     |                 |                 |                 |                 |                 |     |
| Yes                                 | 0.45            | 0.47           | 0.43            |     | 0.482           | 0.500           | 0.492           | 0.445           | 0.318           | **  |
| No                                  | 0.55            | 0.53           | 0.57            |     | 0.518           | 0.500           | 0.508           | 0.555           | 0.682           | **  |
| Daily cooking time in family        | 1.98<br>(1.24)  | 1.86<br>(1.22) | 2.11<br>(1.26)  | **  | 1.53<br>(1.26)  | 2.16<br>(1.28)  | 2.01<br>(1.10)  | 2.44<br>(2.35)  | 2.00<br>(1.05)  | *** |
| Indoor environment                  |                 |                |                 |     |                 |                 |                 |                 |                 |     |
| Fuel use - LPG                      |                 |                |                 |     |                 |                 |                 |                 |                 |     |
| Yes                                 | 0.19            | 0.18           | 0.19            |     | 0.105           | 0.152           | 0.287           | 0.267           | 0.148           | *   |
| No                                  | 0.81            | 0.82           | 0.81            |     | 0.677           | 0.804           | 0.646           | 0.685           | 0.807           | *   |
| Fuel use - natural gas              |                 |                |                 |     |                 |                 |                 |                 |                 |     |
| Yes                                 | 0.72            | 0.71           | 0.73            |     | 0.677           | 0.804           | 0.646           | 0.685           | 0.807           |     |
| No                                  | 0.28            | 0.29           | 0.27            |     | 0.323           | 0.196           | 0.354           | 0.315           | 0.193           |     |
| Fuel use - electricity              |                 |                |                 |     |                 |                 |                 |                 |                 |     |
| Yes                                 | 0.34            | 0.3            | 0.37            | *   | 0.345           | 0.310           | 0.320           | 0.397           | 0.313           |     |
| No                                  | 0.66            | 0.7            | 0.63            | *   | 0.655           | 0.690           | 0.680           | 0.603           | 0.688           |     |
| Fuel use - coal                     |                 |                |                 |     |                 |                 |                 |                 |                 |     |
| Yes                                 | 0.02            | 0.02           | 0.03            |     | 0.014           | 0.006           | 0.022           | 0.041           | 0.028           |     |
| No                                  | 0.98            | 0.98           | 0.97            |     | 0.986           | 0.994           | 0.978           | 0.959           | 0.972           |     |
| Hours of daily natural ventilation  | 16.39<br>(7.94) | 16.5<br>(7.95) | 16.29<br>(7.93) |     | 15.75<br>(8.17) | 15.77<br>(8.04) | 15.48<br>(8.43) | 17.21<br>(7.23) | 18.02<br>(7.35) | **  |
| Air conditioner                     |                 |                |                 |     |                 |                 |                 |                 |                 |     |
| Yes                                 | 0.35            | 0.34           | 0.35            |     | 0.414           | 0.449           | 0.337           | 0.336           | 0.182           | *** |
| No                                  | 0.65            | 0.65           | 0.65            |     | 0.586           | 0.551           | 0.663           | 0.664           | 0.818           | *** |
| Smoking in household                |                 |                |                 |     |                 |                 |                 |                 |                 |     |
| Yes                                 | 0.62            | 0.71           | 0.53            | *** | 0.577           | 0.696           | 0.713           | 0.644           | 0.506           |     |
| No                                  | 0.38            | 0.29           | 0.47            | *** | 0.423           | 0.304           | 0.287           | 0.356           | 0.494           |     |
| Neighborhood Environment            |                 |                |                 |     |                 |                 |                 |                 |                 |     |
| Sidewalk in front of building       |                 |                |                 |     |                 |                 |                 |                 |                 |     |
| Yes                                 | 0.94            | 0.94           | 0.95            |     | 0.964           | 0.956           | 0.923           | 0.925           | 0.949           |     |
| No                                  | 0.06            | 0.06           | 0.05            |     | 0.036           | 0.044           | 0.077           | 0.075           | 0.051           |     |
| Building height type                |                 |                |                 |     |                 |                 |                 |                 |                 |     |
| Flat                                | 0.08            | 0.07           | 0.09            |     | 0.064           | 0.063           | 0.088           | 0.110           | 0.068           |     |
| 2-6 storied building                | 0.64            | 0.67           | 0.61            |     | 0.655           | 0.627           | 0.663           | 0.637           | 0.608           |     |
| +6 storied building                 | 0.28            | 0.27           | 0.30            |     | 0.282           | 0.310           | 0.249           | 0.253           | 0.324           |     |
| Building condition                  | 3.04<br>(0.91)  | 3.04<br>(0.93) | 3.05<br>(0.89)  |     | 3.05<br>(0.84)  | 3.00<br>(0.93)  | 3.07<br>(0.94)  | 3.14<br>(1.09)  | 2.98<br>(0.77)  |     |
| Good (1)                            | 0.09            | 0.10           | 0.09            |     | 0.077           | 0.108           | 0.094           | 0.116           | 0.080           |     |
| Average (3)                         | 0.79            | 0.78           | 0.80            |     | 0.823           | 0.785           | 0.779           | 0.699           | 0.852           |     |

|                                       |       |       |       |       |       |       |       |       |
|---------------------------------------|-------|-------|-------|-------|-------|-------|-------|-------|
| Bad (5)                               | 0.12  | 0.12  | 0.11  | 0.100 | 0.108 | 0.127 | 0.185 | 0.068 |
| <b>Neighborhood situation</b>         |       |       |       |       |       |       |       |       |
| Work unit dormitory                   | 0.017 | 0.011 | 0.023 | 0.009 | 0.025 | 0.028 | 0.014 | 0.011 |
| Normal residential                    | 0.966 | 0.976 | 0.956 | 0.986 | 0.956 | 0.972 | 0.952 | 0.955 |
| Government residential                | 0.003 | 0.000 | 0.007 | 0.000 | 0.000 | 0.000 | 0.000 | 0.017 |
| Luxurious residential                 | 0.012 | 0.011 | 0.014 | 0.005 | 0.019 | 0.000 | 0.027 | 0.017 |
| Construction site temporary dormitory | 0.001 | 0.002 | 0.000 | 0.000 | 0.000 | 0.000 | 0.007 | 0.000 |
| <b>Neighborhood type</b>              |       |       |       |       |       |       |       |       |
| 1 (Traditional)                       | 0.182 | 0.202 | 0.160 | 0.214 | 0.184 | 0.182 | 0.130 | 0.182 |
| 2 (Work-unit)                         | 0.244 | 0.231 | 0.258 | 0.268 | 0.259 | 0.204 | 0.219 | 0.261 |
| 3 (Gated-community)                   | 0.251 | 0.240 | 0.262 | 0.241 | 0.184 | 0.276 | 0.322 | 0.239 |
| 4 (Relocated housing)                 | 0.323 | 0.327 | 0.320 | 0.277 | 0.373 | 0.337 | 0.329 | 0.318 |

Note: Significant level \*  $p < 0.05$ ; \*\*  $p < 0.01$ ; \*\*\*  $p < 0.001$

Categorical variables listed in Table S1, including employment status, working environment, building height type, neighborhood situation and type, are not included in the regression.

**Table S2. Statistical summary of all variables by neighborhood type**

|                                | Mean (SD) or Percentage      |                              |                              |                              |           |
|--------------------------------|------------------------------|------------------------------|------------------------------|------------------------------|-----------|
|                                | Type 1<br>(n=160)            | Type 2<br>(n=215)            | Type 3<br>(n=221)            | Type 4<br>(n=285)            |           |
| <b>Health perception</b>       | <b>2.73</b><br><b>(0.84)</b> | <b>2.63</b><br><b>(1.01)</b> | <b>2.95</b><br><b>(0.91)</b> | <b>2.89</b><br><b>(0.91)</b> | <b>**</b> |
| Excellent (1)                  | 0.056                        | 0.093                        | 0.027                        | 0.039                        |           |
| Very good (2)                  | 0.394                        | 0.442                        | 0.312                        | 0.312                        |           |
| Good (3)                       | 0.363                        | 0.247                        | 0.380                        | 0.411                        |           |
| Fair (4)                       | 0.138                        | 0.177                        | 0.240                        | 0.196                        |           |
| Poor (5)                       | 0.053                        | 0.042                        | 0.041                        | 0.042                        |           |
| <b>Demography</b>              |                              |                              |                              |                              |           |
| <b>Gender</b>                  |                              |                              |                              |                              |           |
| Male                           | 0.57                         | 0.48                         | 0.49                         | 0.52                         |           |
| Female                         | 0.43                         | 0.52                         | 0.51                         | 0.48                         |           |
| <b>Age</b>                     | 42.27<br>(15.44)             | 43.27<br>(15.28)             | 44.16<br>(14.18)             | 44.01<br>(14.7)              |           |
| <b>Years living in Chengdu</b> | 28.31<br>(19.83)             | 26.72<br>(20.15)             | 29.01<br>(20.48)             | 30.28<br>(20.81)             |           |
| <b>Years of education</b>      | 10.13<br>(4.51)              | 10.33<br>(4.44)              | 9.11<br>(4.13)               | 10.2<br>(7.02)               |           |
| <b>Rural hukou</b>             |                              |                              |                              |                              |           |
| Yes                            | <b>0.36</b>                  | <b>0.42</b>                  | <b>0.42</b>                  | <b>0.47</b>                  | <b>*</b>  |
| No                             | <b>0.64</b>                  | <b>0.58</b>                  | <b>0.58</b>                  | <b>0.53</b>                  | <b>*</b>  |
| <b>Chengdu hukou</b>           |                              |                              |                              |                              |           |
| Yes                            | 0.58                         | 0.62                         | 0.59                         | 0.64                         |           |
| No                             | 0.42                         | 0.38                         | 0.41                         | 0.36                         |           |

|                                            |                  |                  |                  |                  |    |
|--------------------------------------------|------------------|------------------|------------------|------------------|----|
| <b>Household income level</b>              | 2.11<br>(0.48)   | 2.15<br>(0.56)   | 2.16<br>(0.6)    | 2.16<br>(0.56)   |    |
| Low (1)                                    | 0.069            | 0.093            | 0.104            | 0.081            |    |
| Average (2)                                | 0.756            | 0.679            | 0.638            | 0.688            |    |
| Mid-high (3)                               | 0.175            | 0.214            | 0.249            | 0.225            |    |
| High (4)                                   | 0.000            | 0.014            | 0.009            | 0.007            |    |
| <b>Employment status</b>                   |                  |                  |                  |                  |    |
| Currently working                          | <b>0.738</b>     | <b>0.670</b>     | <b>0.647</b>     | <b>0.702</b>     | *  |
| Retired                                    | <b>0.206</b>     | <b>0.233</b>     | <b>0.222</b>     | <b>0.161</b>     | *  |
| Unemployed                                 | <b>0.031</b>     | <b>0.014</b>     | <b>0.036</b>     | <b>0.035</b>     | *  |
| Homemaker                                  | <b>0.019</b>     | <b>0.074</b>     | <b>0.063</b>     | <b>0.091</b>     | *  |
| Student                                    | <b>0.007</b>     | <b>0.009</b>     | <b>0.023</b>     | <b>0.000</b>     | *  |
| Others                                     | <b>0.000</b>     | <b>0.000</b>     | <b>0.009</b>     | <b>0.011</b>     | *  |
| <b>Working environment</b>                 |                  |                  |                  |                  |    |
| Indoors                                    | 0.794            | 0.758            | 0.638            | 0.747            |    |
| Outdoors                                   | 0.188            | 0.223            | 0.353            | 0.228            |    |
| Underground/ Underwater                    | 0.013            | 0.005            | 0.000            | 0.007            |    |
| Others                                     | 0.006            | 0.014            | 0.009            | 0.018            |    |
| <b>Chance of getting injured at work</b>   | 2.61<br>(2.37)   | 2.48<br>(2.55)   | 2.97<br>(2.56)   | 2.49<br>(2.56)   |    |
| <b>Years of working</b>                    | 19.49<br>(14.03) | 17.86<br>(13.77) | 20.48<br>(13.42) | 19.73<br>(13.76) |    |
| <b>Marital status</b>                      |                  |                  |                  |                  |    |
| Currently married                          | <b>0.64</b>      | <b>0.76</b>      | <b>0.76</b>      | <b>0.78</b>      | ** |
| Currently not married                      | <b>0.36</b>      | <b>0.24</b>      | <b>0.24</b>      | <b>0.22</b>      | ** |
| <b>Household size</b>                      | 2.89<br>(1.3)    | 3.29<br>(1.26)   | 3.19<br>(1.46)   | 3.19<br>(1.29)   |    |
| <b>Lifestyle and Health Awareness</b>      |                  |                  |                  |                  |    |
| <b>Air quality perception</b>              | 3.58<br>(0.94)   | 3 (0.95)         | 3.27<br>(0.81)   | 3.26<br>(0.89)   |    |
| Very good (1)                              | 0.006            | 0.047            | 0.005            | 0.000            |    |
| Good (2)                                   | 0.125            | 0.265            | 0.136            | 0.218            |    |
| Neutral (3)                                | 0.325            | 0.386            | 0.520            | 0.389            |    |
| Bad (4)                                    | 0.375            | 0.251            | 0.262            | 0.309            |    |
| Very bad (5)                               | 0.180            | 0.051            | 0.077            | 0.084            |    |
| <b>Smoking</b>                             |                  |                  |                  |                  |    |
| Yes                                        | 0.41             | 0.31             | 0.38             | 0.35             |    |
| No                                         | 0.59             | 0.69             | 0.62             | 0.65             |    |
| <b>Hours of weekly exercise</b>            | 6.67<br>(6.38)   | 4.07<br>(5.76)   | 6.99<br>(8.13)   | 6.15<br>(7.96)   |    |
| <b>Health insurance</b>                    |                  |                  |                  |                  |    |
| Yes                                        | 0.88             | 0.67             | 0.9              | 0.85             |    |
| No                                         | 0.12             | 0.33             | 0.1              | 0.15             |    |
| <b>Familiarity to asthma</b>               | 3.04<br>(0.81)   | 2.89<br>(0.87)   | 3.01<br>(0.87)   | 3.1<br>(0.86)    |    |
| Very familiar (1)                          | 0.01             | 0.04             | 0.04             | 0.03             |    |
| Little familiar (2)                        | 0.27             | 0.31             | 0.26             | 0.23             |    |
| Not familiar (3)                           | 0.39             | 0.36             | 0.36             | 0.34             |    |
| Not familiar at all (4)                    | 0.33             | 0.28             | 0.34             | 0.39             |    |
| <b>Willing to pay for asthma treatment</b> |                  |                  |                  |                  |    |
| Yes                                        | 0.53             | 0.42             | 0.43             | 0.45             |    |

|                                           |                               |                               |                               |                               |     |
|-------------------------------------------|-------------------------------|-------------------------------|-------------------------------|-------------------------------|-----|
| No                                        | 0.47                          | 0.58                          | 0.57                          | 0.55                          |     |
| <b>Daily cooking time in family</b>       | 1.98<br>(1.25)                | 1.69<br>(1.06)                | 2.25<br>(1.27)                | 1.99<br>(1.3)                 |     |
| <b>Indoor environment</b>                 |                               |                               |                               |                               |     |
| <b>Fuel use - LPG</b>                     |                               |                               |                               |                               |     |
| Yes                                       | <b>0.08</b>                   | <b>0.08</b>                   | <b>0.19</b>                   | <b>0.33</b>                   | *** |
| No                                        | <b>0.92</b>                   | <b>0.92</b>                   | <b>0.81</b>                   | <b>0.67</b>                   | *** |
| <b>Fuel use - natural gas</b>             |                               |                               |                               |                               |     |
| Yes                                       | <b>0.81</b>                   | <b>0.81</b>                   | <b>0.72</b>                   | <b>0.6</b>                    | *** |
| No                                        | <b>0.19</b>                   | <b>0.19</b>                   | <b>0.28</b>                   | <b>0.4</b>                    | *** |
| <b>Fuel use - electricity</b>             |                               |                               |                               |                               |     |
| Yes                                       | <b>0.38</b>                   | <b>0.42</b>                   | <b>0.21</b>                   | <b>0.34</b>                   | *   |
| No                                        | <b>0.62</b>                   | <b>0.58</b>                   | <b>0.79</b>                   | <b>0.66</b>                   | *   |
| <b>Fuel use - coal</b>                    |                               |                               |                               |                               |     |
| Yes                                       | 0.006                         | 0.028                         | 0.005                         | 0.039                         |     |
| No                                        | 0.994                         | 0.972                         | 0.995                         | 0.961                         |     |
| <b>Hours of daily natural ventilation</b> | <b>15.16</b><br><b>(7.16)</b> | <b>14.15</b><br><b>(8.75)</b> | <b>18.57</b><br><b>(7.35)</b> | <b>17.09</b><br><b>(7.62)</b> | *** |
| <b>Air conditioner</b>                    |                               |                               |                               |                               |     |
| Yes                                       | 0.34                          | 0.42                          | 0.3                           | 0.33                          |     |
| No                                        | 0.66                          | 0.58                          | 0.7                           | 0.67                          |     |
| <b>Smoking in household</b>               |                               |                               |                               |                               |     |
| Yes                                       | 0.63                          | 0.57                          | 0.65                          | 0.64                          |     |
| No                                        | 0.37                          | 0.43                          | 0.35                          | 0.36                          |     |
| <b>Neighborhood Environment</b>           |                               |                               |                               |                               |     |
| <b>Sidewalk in front of building</b>      |                               |                               |                               |                               |     |
| Yes                                       | 0.99                          | 0.97                          | 0.85                          | 0.98                          |     |
| No                                        | 0.01                          | 0.03                          | 0.15                          | 0.02                          |     |
| <b>Building height type</b>               |                               |                               |                               |                               |     |
| Flat                                      | <b>0.00</b>                   | <b>0.04</b>                   | <b>0.11</b>                   | <b>0.12</b>                   | *** |
| 2-6 storied building                      | <b>0.72</b>                   | <b>0.57</b>                   | <b>0.64</b>                   | <b>0.65</b>                   | *** |
| +6 storied building                       | <b>0.28</b>                   | <b>0.40</b>                   | <b>0.24</b>                   | <b>0.23</b>                   | *** |
| <b>Building condition</b>                 |                               |                               |                               |                               |     |
|                                           | 3.38<br>(0.9)                 | 2.8<br>(0.83)                 | 3.04<br>(0.97)                | 3.04<br>(0.87)                |     |
| Good (1)                                  | 0.03                          | 0.14                          | 0.11                          | 0.08                          |     |
| Average (3)                               | 0.76                          | 0.82                          | 0.76                          | 0.81                          |     |
| Bad (5)                                   | 0.21                          | 0.04                          | 0.13                          | 0.11                          |     |
| <b>Neighborhood situation</b>             |                               |                               |                               |                               |     |
| Work unit dormitory                       | 0.063                         | 0.014                         | 0.000                         | 0.007                         |     |
| Normal residential                        | 0.931                         | 0.958                         | 0.991                         | 0.972                         |     |
| Government residential                    | 0.006                         | 0.000                         | 0.005                         | 0.004                         |     |
| Luxurious residential                     | 0.000                         | 0.028                         | 0.000                         | 0.018                         |     |
| Construction site temporary dormitory     | 0.000                         | 0.000                         | 0.005                         | 0.000                         |     |
| <b>Neighborhood type</b>                  |                               |                               |                               |                               |     |
| 1 (Traditional)                           |                               |                               |                               |                               |     |
| 2 (Work-unit)                             |                               |                               |                               |                               |     |
| 3 (Gated-community)                       |                               |                               |                               |                               |     |
| 4 (Relocated housing)                     |                               |                               |                               |                               |     |

Note: Significant level \*  $p < 0.05$ ; \*\*  $p < 0.01$ ; \*\*\*  $p < 0.001$

**Table S3. Linear regression results of self-rated health perception of the whole population and by gender**

|                                       | All            |                       | Male           |                   | Female         |                       |
|---------------------------------------|----------------|-----------------------|----------------|-------------------|----------------|-----------------------|
|                                       | Coef.          | P-value               | Coef.          | P-value           | Coef.          | P-value               |
| (Intercept)                           | 0.9536         | 0.0095 **             | 0.6588         | 0.1682            | 1.9197         | 0.0003 ***            |
| <b>Demography</b>                     |                |                       |                |                   |                |                       |
| Gender                                | <b>0.2053</b>  | <b>0.0059 **</b>      |                |                   |                |                       |
| Age                                   | <b>0.0232</b>  | <b>9.3200E-08 ***</b> | <b>0.0215</b>  | <b>0.0015 **</b>  | <b>0.0253</b>  | <b>2.4300E-05 ***</b> |
| Years living in Chengdu               | <b>0.0047</b>  | <b>0.0304 *</b>       | <b>0.0100</b>  | <b>0.0024 **</b>  | 0.0009         | 0.7699                |
| Years of education                    | -0.0123        | 0.0645                | -0.0098        | 0.2000            | -0.0232        | 0.0957                |
| Rural hukou                           | 0.0460         | 0.5795                | 0.0969         | 0.4154            | -0.0122        | 0.9180                |
| Chengdu hukou                         | -0.1550        | 0.0696                | <b>-0.2621</b> | <b>0.0337 *</b>   | -0.0681        | 0.5777                |
| Household income level                | -0.0760        | 0.2103                | 0.0492         | 0.5477            | <b>-0.2325</b> | <b>0.0121 *</b>       |
| Chance of getting injured at work     | 0.0066         | 0.5829                | -0.0062        | 0.7038            | 0.0265         | 0.1459                |
| Years of working                      | -0.0006        | 0.8804                | -0.0016        | 0.8125            | -0.0047        | 0.3898                |
| Marital status                        | -0.1189        | 0.1163                | -0.0275        | 0.7974            | <b>-0.2274</b> | <b>0.0409 *</b>       |
| Household size                        | 0.0114         | 0.6258                | -0.0198        | 0.5704            | 0.0370         | 0.2526                |
| <b>Lifestyle and Health Awareness</b> |                |                       |                |                   |                |                       |
| Air quality perception                | <b>0.1551</b>  | <b>1.5500E-06 ***</b> | <b>0.1747</b>  | <b>0.0001 ***</b> | <b>0.1385</b>  | <b>0.0035 **</b>      |
| Smoking                               | -0.0818        | 0.3758                | -0.1279        | 0.4232            | -0.0906        | 0.6185                |
| Hours of weekly exercise              | -0.0073        | 0.0789                | -0.0028        | 0.6280            | -0.0104        | 0.1037                |
| Health insurance                      | <b>0.1666</b>  | <b>0.0419 *</b>       | 0.1267         | 0.2800            | 0.2307         | 0.0501                |
| Familiarity to asthma                 | 0.0471         | 0.1615                | 0.0320         | 0.4858            | 0.0469         | 0.3638                |
| Willing to pay for asthma treatment   | 0.0055         | 0.9248                | -0.0037        | 0.9643            | 0.0628         | 0.4556                |
| Daily cooking time in family          | -0.0016        | 0.9538                | -0.0159        | 0.6909            | -0.0158        | 0.6899                |
| <b>Indoor environment</b>             |                |                       |                |                   |                |                       |
| Fuel use - LPG                        | -0.1334        | 0.2847                | 0.0135         | 0.9403            | -0.2379        | 0.1883                |
| Fuel use - natural gas                | 0.1105         | 0.2991                | 0.2799         | 0.0622 .          | -0.0161        | 0.9208                |
| Fuel use - electricity                | -0.0631        | 0.3366                | -0.0799        | 0.3989            | -0.0640        | 0.4954                |
| Fuel use - coal                       | 0.0745         | 0.7085                | -0.2565        | 0.4280            | 0.2333         | 0.3643                |
| Hours of daily natural ventilation    | <b>0.0127</b>  | <b>0.0008 ***</b>     | <b>0.0177</b>  | <b>0.0011 **</b>  | 0.0084         | 0.1227                |
| Air conditioner                       | <b>-0.1700</b> | <b>0.0114 *</b>       | -0.1867        | 0.0526 .          | -0.1141        | 0.2362                |
| Smoking in household                  | <b>0.2014</b>  | <b>0.0084 **</b>      | 0.2613         | 0.1215            | <b>0.2051</b>  | <b>0.0280 *</b>       |
| <b>Neighborhood environment</b>       |                |                       |                |                   |                |                       |
| Sidewalk in front of building         | -0.1125        | 0.3685                | -0.1480        | 0.3767            | -0.0086        | 0.9646                |
| Building condition                    | -0.0277        | 0.4325                | -0.0139        | 0.7783            | -0.0270        | 0.6067                |

Note: Significant level \*  $p < 0.05$ ; \*\*  $p < 0.01$ ; \*\*\*  $p < 0.001$

**Table S4. Linear regression results of self-rated health perception by age group**

|                                       | Age 18-29     |                    | Age 30-39 |         | Age 40-49     |                | Age 50-59     |                | Age 60+       |                    |
|---------------------------------------|---------------|--------------------|-----------|---------|---------------|----------------|---------------|----------------|---------------|--------------------|
|                                       | Coef.         | P-value            | Coef.     | P-value | Coef.         | P-value        | Coef.         | P-value        | Coef.         | P-value            |
| (Intercept)                           | 1.135         | 0.070              | 1.635     | 0.044*  | 3.655         | 1.50E-05***    | 1.864         | 0.065          | 2.491         | 0.012*             |
| <b>Demography</b>                     |               |                    |           |         |               |                |               |                |               |                    |
| Gender                                | <b>0.301</b>  | <b>0.011*</b>      | 0.031     | 0.867   | 0.133         | 0.502          | 0.312         | 0.199          | 0.159         | 0.394              |
| Age                                   |               |                    |           |         |               |                |               |                |               |                    |
| Years living in Chengdu               | 0.006         | 0.406              | 0.003     | 0.723   | 0.003         | 0.646          | 0.010         | 0.086          | 0.004         | 0.276              |
| Years of education                    | 0.012         | 0.550              | 0.004     | 0.611   | <b>-0.051</b> | <b>0.028 *</b> | 0.104         | 0.144          | -0.027        | 0.200              |
| Rural hukou                           | -0.057        | 0.655              | 0.104     | 0.583   | -0.326        | 0.131          | 0.384         | 0.162          | 0.128         | 0.586              |
| Chengdu hukou                         | -0.160        | 0.250              | -0.070    | 0.726   | -0.278        | 0.257          | 0.141         | 0.570          | -0.379        | 0.163              |
| Income level                          | 0.096         | 0.384              | 0.074     | 0.623   | 0.017         | 0.897          | -0.348        | 0.060          | -0.075        | 0.621              |
| Chance of getting injured at work     | -0.006        | 0.797              | 0.019     | 0.507   | 0.004         | 0.890          | 0.023         | 0.486          | 0.016         | 0.629              |
| Years of working                      | 0.005         | 0.778              | 0.004     | 0.802   | -0.016        | 0.205          | -0.006        | 0.483          | 0.010         | 0.173              |
| Marital status                        | -0.008        | 0.949              | 0.150     | 0.514   | -0.510        | 0.057          | -0.288        | 0.223          | -0.150        | 0.481              |
| Household size                        | 0.015         | 0.685              | -0.060    | 0.272   | -0.036        | 0.587          | 0.086         | 0.178          | -0.011        | 0.862              |
| <b>Lifestyle and Health Awareness</b> |               |                    |           |         |               |                |               |                |               |                    |
| Air quality perception                | -0.020        | 0.724              | 0.144     | 0.054   | 0.131         | 0.115          | 0.126         | 0.173          | <b>0.337</b>  | <b>1.29E-05***</b> |
| Smoking                               | <b>-0.368</b> | <b>0.017*</b>      | -0.253    | 0.250   | -0.009        | 0.969          | 0.258         | 0.336          | 0.005         | 0.984              |
| Hours of weekly exercise              | -0.009        | 0.329              | -0.016    | 0.150   | -0.010        | 0.312          | 0.017         | 0.076          | <b>-0.023</b> | <b>0.023*</b>      |
| Health insurance                      | 0.237         | 0.062              | 0.095     | 0.620   | 0.128         | 0.526          | 0.188         | 0.433          | -0.036        | 0.901              |
| Familiarity to asthma                 | 0.105         | 0.054              | 0.004     | 0.960   | 0.071         | 0.394          | 0.035         | 0.711          | -0.051        | 0.552              |
| Willing to pay for asthma treatment   | 0.004         | 0.967              | -0.036    | 0.797   | -0.100        | 0.445          | 0.064         | 0.691          | 0.123         | 0.445              |
| Daily cooking time in family          | 0.025         | 0.635              | 0.018     | 0.789   | 0.035         | 0.609          | <b>-0.137</b> | <b>0.042*</b>  | 3.96E-04      | 0.996              |
| <b>Indoor environment</b>             |               |                    |           |         |               |                |               |                |               |                    |
| Fuel use - LPG                        | -0.415        | 0.063              | 0.224     | 0.521   | -0.386        | 0.214          | -0.164        | 0.654          | 0.081         | 0.840              |
| Fuel use - natural gas                | -0.093        | 0.516              | 0.490     | 0.111   | -0.486        | 0.118          | 0.528         | 0.139          | 0.409         | 0.293              |
| Fuel use - electricity                | <b>-0.378</b> | <b>6.26E-04***</b> | -0.100    | 0.533   | -0.096        | 0.530          | -0.005        | 0.978          | <b>0.385</b>  | <b>0.028*</b>      |
| Fuel use - coal                       | <b>0.949</b>  | <b>0.02 *</b>      | -0.737    | 0.384   | -0.319        | 0.472          | -0.116        | 0.777          | 0.107         | 0.823              |
| Hours of daily natural ventilation    | <b>0.023</b>  | <b>5.71E-04***</b> | 0.013     | 0.211   | 0.009         | 0.252          | <b>0.031</b>  | <b>0.010**</b> | -0.019        | 0.061              |
| Air conditioner                       | -0.197        | 0.075              | -0.058    | 0.704   | 0.007         | 0.967          | -0.099        | 0.621          | -0.032        | 0.873              |
| Smoking in household                  | <b>0.274</b>  | <b>0.033 *</b>     | 0.339     | 0.063   | 0.082         | 0.676          | -0.132        | 0.518          | 0.371         | 0.074              |
| <b>Neighborhood environment</b>       |               |                    |           |         |               |                |               |                |               |                    |
| Sidewalk in front of building         | -0.370        | 0.152              | -0.693    | 0.038   | 0.228         | 0.385          | 0.233         | 0.459          | -0.386        | 0.259              |
| Building condition                    | 0.055         | 0.378              | -0.003    | 0.973   | -0.032        | 0.708          | -0.070        | 0.434          | 0.055         | 0.607              |

Note: Significant level \*  $p < 0.05$ ; \*\*  $p < 0.01$ ; \*\*\*  $p < 0.001$

**Table S5. Odd ratio and confidence interval of self-rated health perception by age group.**

|                   | Age 18-29     |              |              | Age 30-39 |        |       | Age 40-49 |        |       | Age 50-59 |        |       | Age 60+ |        |       |
|-------------------|---------------|--------------|--------------|-----------|--------|-------|-----------|--------|-------|-----------|--------|-------|---------|--------|-------|
|                   | OR            | 95% CI       |              | OR        | 95% CI |       | OR        | 95% CI |       | OR        | 95% CI |       | OR      | 95% CI |       |
| <b>Demography</b> |               |              |              |           |        |       |           |        |       |           |        |       |         |        |       |
| Gender            | <b>1.351*</b> | <b>1.072</b> | <b>1.704</b> | 1.032     | 0.713  | 1.493 | 1.142     | 0.773  | 1.687 | 1.366     | 0.847  | 2.202 | 1.173   | 0.811  | 1.695 |

|                                       |                 |              |              |               |              |              |               |              |              |                |              |              |                 |              |              |
|---------------------------------------|-----------------|--------------|--------------|---------------|--------------|--------------|---------------|--------------|--------------|----------------|--------------|--------------|-----------------|--------------|--------------|
| Years living in Chengdu               | 1.006           | 0.992        | 1.019        | 1.003         | 0.988        | 1.018        | 1.003         | 0.991        | 1.015        | 1.010          | 0.999        | 1.021        | 1.004           | 0.997        | 1.012        |
| Years of education                    | 1.012           | 0.973        | 1.053        | 1.004         | 0.987        | 1.022        | <b>0.950*</b> | <b>0.908</b> | <b>0.994</b> | 0.960          | 0.909        | 1.014        | 0.973           | 0.933        | 1.015        |
| Rural hukou                           | 0.945           | 0.735        | 1.214        | 1.110         | 0.763        | 1.615        | 0.722         | 0.473        | 1.103        | 1.467          | 0.856        | 2.516        | 1.137           | 0.714        | 1.810        |
| Chengdu hukou                         | 0.852           | 0.648        | 1.120        | 0.932         | 0.628        | 1.384        | 0.757         | 0.467        | 1.227        | 1.151          | 0.705        | 1.878        | 0.685           | 0.402        | 1.167        |
| Household income level                | 1.101           | 0.886        | 1.368        | 1.076         | 0.801        | 1.447        | 1.017         | 0.787        | 1.313        | 0.706          | 0.491        | 1.016        | 0.928           | 0.688        | 1.251        |
| Chance of getting injured at work     | 0.994           | 0.953        | 1.038        | 1.019         | 0.963        | 1.079        | 1.004         | 0.952        | 1.058        | 1.023          | 0.959        | 1.092        | 1.016           | 0.953        | 1.083        |
| Years of working                      | 1.005           | 0.969        | 1.043        | 1.004         | 0.976        | 1.032        | 0.985         | 0.961        | 1.009        | 0.995          | 0.979        | 1.010        | 1.010           | 0.996        | 1.025        |
| Marital status                        | 0.992           | 0.781        | 1.260        | 1.162         | 0.738        | 1.828        | 0.600         | 0.355        | 1.015        | 0.750          | 0.470        | 1.194        | 0.860           | 0.565        | 1.311        |
| Household size                        | 1.015           | 0.944        | 1.091        | 0.941         | 0.845        | 1.049        | 0.965         | 0.847        | 1.099        | 1.090          | 0.961        | 1.236        | 0.989           | 0.875        | 1.119        |
| <b>Lifestyle and Health Awareness</b> |                 |              |              |               |              |              |               |              |              |                |              |              |                 |              |              |
| Air quality perception                | 0.980           | 0.878        | 1.095        | 1.154         | 0.998        | 1.336        | 1.139         | 0.968        | 1.341        | 1.134          | 0.946        | 1.361        | <b>1.401***</b> | <b>1.209</b> | <b>1.624</b> |
| Smoking                               | <b>0.692*</b>   | <b>0.511</b> | <b>0.936</b> | 0.777         | 0.503        | 1.198        | 0.991         | 0.630        | 1.560        | 1.295          | 0.762        | 2.201        | 1.005           | 0.608        | 1.661        |
| Hours of weekly exercise              | 0.991           | 0.973        | 1.009        | 0.984         | 0.963        | 1.006        | 0.990         | 0.972        | 1.009        | 1.017          | 0.998        | 1.036        | <b>0.977*</b>   | <b>0.958</b> | <b>0.997</b> |
| Health insurance                      | 1.268           | 0.988        | 1.628        | 1.099         | 0.754        | 1.603        | 1.136         | 0.764        | 1.689        | 1.206          | 0.753        | 1.933        | 0.965           | 0.549        | 1.698        |
| Familiarity to asthma                 | 1.111           | 0.998        | 1.237        | 1.004         | 0.855        | 1.179        | 1.074         | 0.911        | 1.266        | 1.035          | 0.860        | 1.247        | 0.950           | 0.802        | 1.126        |
| Willing to pay for asthma treatment   | 1.004           | 0.827        | 1.219        | 0.965         | 0.732        | 1.272        | 0.905         | 0.698        | 1.172        | 1.066          | 0.776        | 1.464        | 1.131           | 0.823        | 1.553        |
| Daily cooking time in family          | 1.025           | 0.925        | 1.136        | 1.018         | 0.894        | 1.158        | 1.035         | 0.906        | 1.182        | <b>0.872*</b>  | <b>0.764</b> | <b>0.995</b> | 1.000           | 0.852        | 1.175        |
| <b>Indoor environment</b>             |                 |              |              |               |              |              |               |              |              |                |              |              |                 |              |              |
| Fuel use - LPG                        | 0.661           | 0.427        | 1.023        | 1.251         | 0.629        | 2.486        | 0.680         | 0.369        | 1.252        | 0.849          | 0.413        | 1.746        | 1.085           | 0.491        | 2.396        |
| Fuel use - natural gas                | 0.912           | 0.688        | 1.207        | 1.632         | 0.893        | 2.984        | 0.615         | 0.334        | 1.134        | 1.696          | 0.841        | 3.420        | 1.505           | 0.700        | 3.238        |
| Fuel use - electricity                | <b>0.685***</b> | <b>0.553</b> | <b>0.849</b> | 0.905         | 0.659        | 1.241        | 0.908         | 0.671        | 1.229        | 0.995          | 0.669        | 1.478        | <b>1.470*</b>   | <b>1.043</b> | <b>2.072</b> |
| Fuel use - coal                       | <b>2.582*</b>   | <b>1.128</b> | <b>5.910</b> | 0.479         | 0.090        | 2.542        | 0.727         | 0.303        | 1.741        | 0.890          | 0.395        | 2.007        | 1.113           | 0.432        | 2.869        |
| Hours of daily natural ventilation    | <b>1.023***</b> | <b>1.010</b> | <b>1.037</b> | 1.013         | 0.993        | 1.033        | 1.009         | 0.993        | 1.026        | <b>1.031**</b> | <b>1.008</b> | <b>1.056</b> | 0.981           | 0.962        | 1.001        |
| Air conditioner                       | 0.821           | 0.661        | 1.021        | 0.944         | 0.700        | 1.273        | 1.007         | 0.727        | 1.395        | 0.906          | 0.610        | 1.345        | 0.969           | 0.655        | 1.432        |
| Smoking in household                  | <b>1.316*</b>   | <b>1.022</b> | <b>1.693</b> | 1.404         | 0.981        | 2.010        | 1.086         | 0.736        | 1.603        | 0.876          | 0.585        | 1.313        | 1.449           | 0.964        | 2.179        |
| <b>Neighborhood environment</b>       |                 |              |              |               |              |              |               |              |              |                |              |              |                 |              |              |
| Sidewalk in front of building         | 0.691           | 0.416        | 1.148        | <b>0.500*</b> | <b>0.260</b> | <b>0.961</b> | 1.256         | 0.749        | 2.108        | 1.263          | 0.678        | 2.351        | 0.680           | 0.346        | 1.333        |
| Building condition                    | 1.057           | 0.934        | 1.196        | 0.997         | 0.847        | 1.174        | 0.968         | 0.817        | 1.148        | 0.932          | 0.780        | 1.113        | 1.057           | 0.855        | 1.305        |

Note: Significant levels \*  $p < 0.05$ ; \*\*  $p < 0.01$ ; \*\*\*  $p < 0.001$

**Table S6. Linear regression results of self-rated health perception by neighborhood type**

|                                       | Type 1 (Traditional) |               |     | Type 2 (Work-unit) |               |     | Type 3 (Gated-community) |               |    | Type 4 (Relocated housing) |               |    |
|---------------------------------------|----------------------|---------------|-----|--------------------|---------------|-----|--------------------------|---------------|----|----------------------------|---------------|----|
|                                       | Coef.                | P-value       |     | Coef.              | P-value       |     | Coef.                    | P-value       |    | Coef.                      | P-value       |    |
| (Intercept)                           | 4.2147               | 0.0001        | *** | 1.8740             | 0.0418        | *   | 0.3804                   | 0.6331        |    | -0.0534                    | 0.9374        |    |
| <b>Demography</b>                     |                      |               |     |                    |               |     |                          |               |    |                            |               |    |
| Gender                                | -0.0794              | 0.6264        |     | 0.1722             | 0.2529        |     | 0.1120                   | 0.5192        |    | <b>0.3729</b>              | <b>0.0036</b> | ** |
| Age                                   | -0.0010              | 0.9305        |     | <b>0.0230</b>      | <b>0.0109</b> | *   | <b>0.0242</b>            | <b>0.0131</b> | *  | <b>0.0234</b>              | <b>0.0012</b> | ** |
| Years living in Chengdu               | 0.0104               | 0.0561        | .   | -0.0023            | 0.5896        |     | 0.0063                   | 0.2035        |    | <b>0.0077</b>              | <b>0.0337</b> | *  |
| Years of education                    | <b>-0.0866</b>       | <b>0.0005</b> | *** | -0.0085            | 0.6857        |     | -0.0024                  | 0.9129        |    | -0.0082                    | 0.2860        |    |
| Rural hukou                           | <b>-0.4932</b>       | <b>0.0204</b> | *   | -0.2927            | 0.1156        |     | 0.2723                   | 0.1448        |    | <b>0.3886</b>              | <b>0.0066</b> | ** |
| Chengdu hukou                         | <b>-0.8168</b>       | <b>0.0001</b> | *** | -0.1697            | 0.3775        |     | 0.2121                   | 0.2435        |    | -0.0390                    | 0.7841        |    |
| Income level                          | 0.1605               | 0.3357        |     | <b>-0.2881</b>     | <b>0.0252</b> | *   | 0.0655                   | 0.6112        |    | -0.0264                    | 0.7899        |    |
| Chance of getting injured at work     | -0.0239              | 0.4631        |     | 0.0197             | 0.4283        |     | 0.0178                   | 0.4740        |    | 0.0045                     | 0.8256        |    |
| Years of working                      | 0.0123               | 0.2694        |     | <b>0.0174</b>      | <b>0.0489</b> | *   | -0.0114                  | 0.2083        |    | -0.0062                    | 0.3553        |    |
| Marital status                        | -0.2421              | 0.1344        |     | 0.0402             | 0.8102        |     | -0.2984                  | 0.0718        | .  | -0.0126                    | 0.9233        |    |
| Household size                        | 0.0650               | 0.2773        |     | -0.0800            | 0.1507        |     | 0.0690                   | 0.1233        |    | -0.0098                    | 0.8121        |    |
| <b>Lifestyle and Health Awareness</b> |                      |               |     |                    |               |     |                          |               |    |                            |               |    |
| Air quality perception                | 0.0863               | 0.2642        |     | <b>0.2582</b>      | <b>0.0001</b> | *** | <b>0.1976</b>            | <b>0.0105</b> | *  | 0.0563                     | 0.3252        |    |
| Smoking                               | -0.1218              | 0.5575        |     | 0.0522             | 0.7851        |     | -0.3238                  | 0.1211        |    | -0.0129                    | 0.9350        |    |
| Hours of weekly exercise              | 0.0044               | 0.7146        |     | <b>-0.0253</b>     | <b>0.0483</b> | *   | -0.0101                  | 0.1848        |    | -0.0013                    | 0.8379        |    |
| Health insurance                      | -0.0759              | 0.7271        |     | -0.0405            | 0.7826        |     | 0.1820                   | 0.3973        |    | <b>0.3060</b>              | <b>0.0268</b> | *  |
| Familiarity to asthma                 | 0.0865               | 0.3139        |     | -0.0687            | 0.3439        |     | 0.1269                   | 0.0644        | .  | 0.0050                     | 0.9312        |    |
| Willing to pay for asthma treatment   | 0.0081               | 0.9520        |     | 0.1865             | 0.1444        |     | -0.1394                  | 0.2530        |    | -0.0777                    | 0.4372        |    |
| Daily cooking time in family          | 0.0734               | 0.2867        |     | 0.0247             | 0.7363        |     | -0.0684                  | 0.2105        |    | 0.0129                     | 0.7843        |    |
| <b>Indoor environment</b>             |                      |               |     |                    |               |     |                          |               |    |                            |               |    |
| Fuel use - LPG                        | 0.2749               | 0.4491        |     | 0.0401             | 0.8811        |     | <b>-0.8147</b>           | <b>0.0027</b> | ** | -0.0529                    | 0.8087        |    |
| Fuel use - natural gas                | 0.2057               | 0.4269        |     | 0.1311             | 0.5239        |     | -0.3110                  | 0.1765        |    | 0.2602                     | 0.2405        |    |
| Fuel use - electricity                | -0.0618              | 0.7032        |     | 0.1438             | 0.2778        |     | 0.1564                   | 0.3186        |    | -0.2261                    | 0.0517        | .  |
| Fuel use - coal                       | -0.8395              | 0.3339        |     | 0.4525             | 0.2352        |     | -0.5638                  | 0.5486        |    | -0.1534                    | 0.5607        |    |
| Hours of daily natural ventilation    | -0.0168              | 0.1050        |     | 0.0112             | 0.1343        |     | <b>0.0208</b>            | <b>0.0122</b> | *  | <b>0.0160</b>              | <b>0.0173</b> | *  |
| Air conditioner                       | <b>-0.4008</b>       | <b>0.0129</b> | *   | -0.0994            | 0.5141        |     | -0.1177                  | 0.3947        |    | -0.1007                    | 0.3932        |    |
| Smoking in household                  | 0.1953               | 0.2921        |     | 0.0366             | 0.8125        |     | <b>0.3551</b>            | <b>0.0276</b> | *  | 0.0654                     | 0.6159        |    |
| <b>Neighborhood environment</b>       |                      |               |     |                    |               |     |                          |               |    |                            |               |    |
| Sidewalk in front of building         | -0.4612              | 0.4407        |     | -0.5374            | 0.1240        |     | -0.0762                  | 0.6706        |    | 0.3165                     | 0.3201        |    |
| Building condition                    | <b>-0.1934</b>       | <b>0.0179</b> | *   | -0.0334            | 0.7098        |     | 0.0294                   | 0.6863        |    | 0.0549                     | 0.3755        |    |

Note: Significant level \*  $p < 0.05$ ; \*\*  $p < 0.01$ ; \*\*\*  $p < 0.001$

**Table S7. Odd ratio and confidence interval of self-rated health perception by neighborhood type.**

|                   | Type 1 (Traditional) |       |         | Type 2 (Work-unit) |       |        | Type 3 (Gated-community) |       |        | Type 4 (Relocated housing) |       |        |
|-------------------|----------------------|-------|---------|--------------------|-------|--------|--------------------------|-------|--------|----------------------------|-------|--------|
|                   | OR                   | 2.50% | 97.50%  | OR                 | 2.50% | 97.50% | OR                       | 2.50% | 97.50% | OR                         | 2.50% | 97.50% |
| (Intercept)       | 67.672               | 8.337 | 549.301 | 6.514              | 1.073 | 39.560 | 1.463                    | 0.305 | 7.027  | 0.948                      | 0.249 | 3.606  |
| <b>Demography</b> |                      |       |         |                    |       |        |                          |       |        |                            |       |        |

|                                       |                 |              |              |                 |              |              |               |              |              |                |              |              |
|---------------------------------------|-----------------|--------------|--------------|-----------------|--------------|--------------|---------------|--------------|--------------|----------------|--------------|--------------|
| Gender                                | 0.924           | 0.669        | 1.274        | 1.188           | 0.883        | 1.597        | 1.119         | 0.794        | 1.575        | <b>1.452**</b> | <b>1.131</b> | <b>1.864</b> |
| Age                                   | 0.999           | 0.976        | 1.022        | <b>1.023*</b>   | <b>1.005</b> | <b>1.042</b> | <b>1.025*</b> | <b>1.005</b> | <b>1.044</b> | <b>1.024**</b> | <b>1.009</b> | <b>1.038</b> |
| Years living in Chengdu               | 1.010           | 1.000        | 1.021        | 0.998           | 0.989        | 1.006        | 1.006         | 0.997        | 1.016        | <b>1.008*</b>  | <b>1.001</b> | <b>1.015</b> |
| Years of education                    | <b>0.917***</b> | <b>0.874</b> | <b>0.962</b> | 0.992           | 0.951        | 1.033        | 0.998         | 0.955        | 1.042        | 0.992          | 0.977        | 1.007        |
| <u>Rural hukou</u>                    | <b>0.611*</b>   | <b>0.403</b> | <b>0.925</b> | 0.746           | 0.518        | 1.075        | 1.313         | 0.910        | 1.895        | <b>1.475**</b> | <b>1.115</b> | <b>1.950</b> |
| Chengdu hukou                         | <b>0.442***</b> | <b>0.299</b> | <b>0.654</b> | 0.844           | 0.578        | 1.232        | 1.236         | 0.865        | 1.768        | 0.962          | 0.727        | 1.273        |
| Household income level                | 1.174           | 0.845        | 1.631        | <b>0.750*</b>   | <b>0.583</b> | <b>0.964</b> | 1.068         | 0.829        | 1.376        | 0.974          | 0.802        | 1.184        |
| Chance of getting injured             |                 |              |              |                 |              |              |               |              |              |                |              |              |
| at work                               | 0.976           | 0.916        | 1.041        | 1.020           | 0.971        | 1.071        | 1.018         | 0.969        | 1.069        | 1.004          | 0.965        | 1.045        |
| Years of working                      | 1.012           | 0.990        | 1.035        | <b>1.018*</b>   | <b>1.000</b> | <b>1.035</b> | 0.989         | 0.971        | 1.006        | 0.994          | 0.981        | 1.007        |
| Marital status                        | 0.785           | 0.571        | 1.079        | 1.041           | 0.748        | 1.448        | 0.742         | 0.536        | 1.027        | 0.987          | 0.763        | 1.278        |
| Household size                        | 1.067           | 0.948        | 1.201        | 0.923           | 0.828        | 1.030        | 1.071         | 0.981        | 1.170        | 0.990          | 0.913        | 1.074        |
| <b>Lifestyle and Health Awareness</b> |                 |              |              |                 |              |              |               |              |              |                |              |              |
| Air quality perception                | 1.090           | 0.936        | 1.269        | <b>1.295***</b> | <b>1.144</b> | <b>1.464</b> | <b>1.218*</b> | <b>1.048</b> | <b>1.417</b> | 1.058          | 0.945        | 1.184        |
| Smoking                               | 0.885           | 0.588        | 1.334        | 1.054           | 0.723        | 1.536        | 0.723         | 0.480        | 1.090        | 0.987          | 0.724        | 1.346        |
| Hours of weekly exercise              | 1.004           | 0.981        | 1.028        | <b>0.975*</b>   | <b>0.951</b> | <b>1.000</b> | 0.990         | 0.975        | 1.005        | 0.999          | 0.987        | 1.011        |
| Health insurance                      | 0.927           | 0.603        | 1.424        | 0.960           | 0.719        | 1.283        | 1.200         | 0.786        | 1.831        | <b>1.358*</b>  | <b>1.036</b> | <b>1.780</b> |
| Familiarity to asthma                 | 1.090           | 0.921        | 1.292        | 0.934           | 0.809        | 1.077        | 1.135         | 0.992        | 1.299        | 1.005          | 0.897        | 1.125        |
| Willing to pay for asthma             |                 |              |              |                 |              |              |               |              |              |                |              |              |
| treatment                             | 1.008           | 0.773        | 1.314        | 1.205           | 0.938        | 1.549        | 0.870         | 0.684        | 1.106        | 0.925          | 0.760        | 1.126        |
| Daily cooking time in                 |                 |              |              |                 |              |              |               |              |              |                |              |              |
| family                                | 1.076           | 0.940        | 1.233        | 1.025           | 0.887        | 1.184        | 0.934         | 0.839        | 1.040        | 1.013          | 0.923        | 1.111        |
| <b>Indoor environment</b>             |                 |              |              |                 |              |              |               |              |              |                |              |              |
| <u>Fuel use - LPG</u>                 | 1.316           | 0.643        | 2.695        | 1.041           | 0.614        | 1.765        | <b>0.448*</b> | <b>0.261</b> | <b>0.751</b> | 0.949          | 0.617        | 1.457        |
| Fuel use - natural gas                | 1.228           | 0.737        | 2.047        | 1.140           | 0.760        | 1.709        | 0.733         | 0.466        | 1.152        | 1.297          | 0.839        | 2.005        |
| Fuel use - electricity                | 0.940           | 0.683        | 1.295        | 1.155           | 0.890        | 1.498        | 1.169         | 0.859        | 1.592        | 0.798          | 0.635        | 1.002        |
| <u>Fuel use - coal</u>                | 0.432           | 0.078        | 2.393        | 1.572           | 0.743        | 3.327        | 0.569         | 0.089        | 3.621        | 0.858          | 0.511        | 1.441        |
| Hours of daily natural                |                 |              |              |                 |              |              |               |              |              |                |              |              |
| ventilation                           | 0.983           | 0.964        | 1.004        | 1.011           | 0.997        | 1.026        | <b>1.021*</b> | <b>1.005</b> | <b>1.038</b> | <b>1.016*</b>  | <b>1.003</b> | <b>1.030</b> |
| Air conditioner                       | <b>0.670*</b>   | <b>0.489</b> | <b>0.917</b> | 0.905           | 0.671        | 1.222        | 0.889         | 0.677        | 1.167        | 0.904          | 0.717        | 1.140        |
| Smoking in household                  | 1.216           | 0.844        | 1.752        | 1.037           | 0.765        | 1.406        | <b>1.426*</b> | <b>1.040</b> | <b>1.955</b> | 1.068          | 0.826        | 1.380        |
| <b>Neighborhood environment</b>       |                 |              |              |                 |              |              |               |              |              |                |              |              |
| <u>Sidewalk in front of</u>           |                 |              |              |                 |              |              |               |              |              |                |              |              |
| <u>building</u>                       | 0.631           | 0.194        | 2.051        | 0.584           | 0.294        | 1.160        | 0.927         | 0.651        | 1.319        | 1.372          | 0.734        | 2.566        |
| Building condition                    | <b>0.824*</b>   | <b>0.703</b> | <b>0.967</b> | 0.973           | 0.908        | 1.042        | 1.030         | 0.892        | 1.189        | 1.056          | 0.935        | 1.193        |

Note: Significant levels \*  $p < 0.05$ ; \*\*  $p < 0.01$ ; \*\*\*  $p < 0.001$

### List S1. Questions used in the survey and given possible answers for multiple choice questions

1. What is your health?  
*Scale from 1 to 5, with 5 is the worst.*
2. What is your gender?  
*Male (1); Female (2)*

3. How old are you?
4. How many years of education did you receive?
5. Is your resident registration rural or non-rural?  
*Rural registration (1); Non-rural registration (0)*
6. Are you a registered resident of Chengdu?  
*Yes (1); No (0)*
7. (For the inspector) Please estimate the income level of the household.  
*Low income (1); Average income (2); Mid-high income (3); High income (4)*
8. What is your current employment status?  
*Currently working or employed including temporary employment; Retired; Waiting for job or unemployed; Full-time homemaker; Full-time student.*
9. What is your current (last) working environment?  
*Indoors (in an office or factory); Outdoors (including in a vehicle); Underground or underwater.*
10. How many years of working experience do you have by the end of 2015?
11. What do you think is the chance of getting injured at your current (last) work?  
*Scale from 0 to 10, with 10 is the highest likelihood.*
12. What is your current marital status?  
*Currently married (1); Not currently married (0).*
13. How many people are living with you in this household?
14. How do you think about the average air quality in Chengdu?  
*Scale from 1 to 5, with 5 is the worst.*
15. Do you smoke currently?  
*Yes (1); No (0).*
16. How many hours on average do you exercise?
17. Do you have any kind of health insurance?  
*Yes (1); No (0).*
18. Are you familiar with asthma?  
*Very familiar (1); A little (2); Not familiar (3); Not familiar at all (4).*
19. The cost is X yuan and is effective for one year, would you participate in this treatment?  
*Yes (1); No (0).*
20. How many total hours do you and other members of your household spend cooking?
21. Do you use this kind of fuel for cooking in your residence: LPG?  
*Yes (1); No (0).*
22. Do you use this kind of fuel for cooking in your residence: Natural gas?  
*Yes (1); No (0).*
23. Do you use this kind of fuel for cooking in your residence: Electricity?  
*Yes (1); No (0).*
24. Do you use this kind of fuel for cooking in your residence: Coal?  
*Yes (1); No (0).*
25. In the current season (spring), how many hours per day of natural ventilation?
26. Are air conditioners typically used anywhere in your residence? (spring)  
*Yes (1); No (0).*
27. Does anybody in your household smoke?  
*Yes (1); No (0).*
28. (For the inspector) Is there a sidewalk in front of the interviewee's house or courtyard?

*Yes (1); No (0).*

29. (For the inspector) What kind of building was the interviewee living in?

*Flat (1); 2-6 storied building (2); More than 6-storied building (3).*

30. (For the inspector) The condition of the building of the interviewee, comparing to other buildings in the city?

*Good (1); Average (3); Bad (5).*

31. (For the inspector) The neighborhood of the interviewee's house belongs to which of the following situations?

*Dormitory of the work unit (1); Normal residential area (2); Government residential area (3); Dormitory of worker of factory or farm (4); High level (luxurious) residential area (5); Temporary dormitory at construction site (6).*

The research is a major component of a multi-component initiative to investigate urban land use, transportation planning, mobile-source air pollution, population health risk, economic effects, and related policy in Chengdu, Sichuan, P. R. China. The Research Center for Contemporary China (RCCC) at Peking University conducted the sampling and fieldwork.

There are two questionnaires in this study. One is “public health survey questionnaire”, and the other is “environmental protection and transportation survey questionnaire”.
